# Supplementary material for: Bioplastic films with unusually good oxygen barrier properties based on potato fruit-juice
Source: Royal Society of Chemistry journal article supplement (doi:10.1039/d1ra01178b), 2021-01-01
Supplement: d1ra01178b1.pdf [file d1ra01178b1.pdf]

Electronic Supplementary Information

**Bioplastic films with unusually good oxygen barrier  
properties, based on potato fruit-juice**

Simi Poulouse<sup>a</sup>, Ilari Jönkkäri<sup>a</sup>, Mikael S. Hedenqvist<sup>b,\*</sup>, Jurkka Kuusipalo<sup>a,\*</sup>

<sup>a</sup> Faculty of Engineering and Natural Sciences, Materials science and environmental engineering, Tampere University, P. O. Box 589, FI-33014, Tampere, Finland.

<sup>b</sup> Department of Fibre and Polymer Technology, School of Engineering Sciences in Chemistry, Biotechnology and Health, KTH Royal Institute of Technology, SE-100 44 Stockholm, Sweden.

Table S1 Average composition of potato fruit juice (dry matter) <sup>1</sup>

| Component                                                       | % drymatter |
|-----------------------------------------------------------------|-------------|
| Protein (N x 6.25)                                              | 26.8        |
| Peptides (N x 6.25)                                             | 4.4         |
| Amino acids + amides (N x 5.13)                                 | 9.6         |
| Other N-containing compounds                                    | 1.8         |
| Sugars                                                          | 15.8        |
| Lipids                                                          | 2.2         |
| Citric acid                                                     | 10.0        |
| Ascorbic acid                                                   | 0.6         |
| Other organic acids (e.g. malic and pyrolidone carboxylic acid) | 2.6         |
| Chlorogenic acid                                                | 0.4         |
| Caffeic acid                                                    | 0.1         |
| Potassium                                                       | 11.2        |
| Phosphorus                                                      | 1.0         |
| Other components                                                | 10.1        |

## REFERENCE

- 1 G. A. van Koningsveld, *Physico-chemical and functional properties of potato proteins*, 2001.
